# Supplementary material for: Direct Measurement of Sedimentation Coefficient Distributions in Multimodal Nanoparticle Mixtures
Source: MDPI journal article supplement (doi:10.3390/nano11041027), 2021-04-17
Supplement: s1 [file s1]

# Supplementary Materials

## Direct Measurement of Sedimentation Coefficient Distributions in Multimodal Nanoparticle Mixtures

Claudia Simone Plüsch, Rouven Stuckert and Alexander Wittemann \*

### Supplementary Figures

The following figures illustrate the derivation of the parameters required to calculate sedimentation coefficients from preparative centrifugal separations. See text of the main article for further explanations.

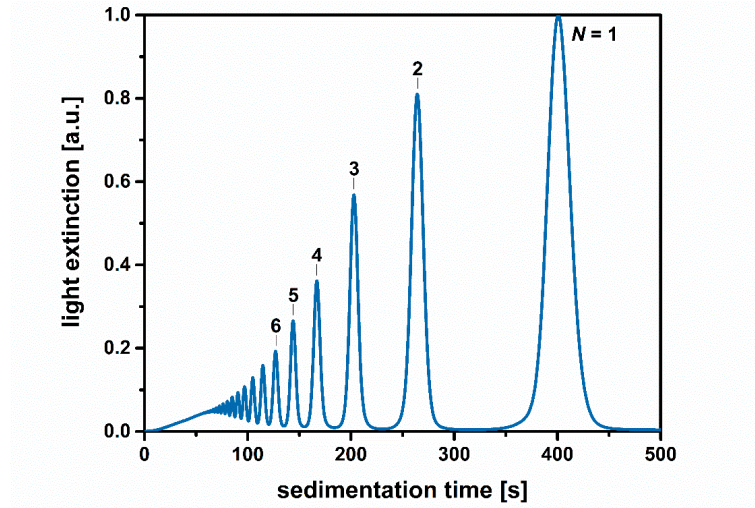

**Figure S1.** A mixture of colloidal clusters as measured by differential centrifugal sedimentation (DCS). The light extinction is recorded continuously as the function of the sedimentation time.  $N$  denotes the number of constituent particles of the clusters. The widths of the peaks are related to the widths of the zones of distinct particle populations arriving at a fixed detector position.

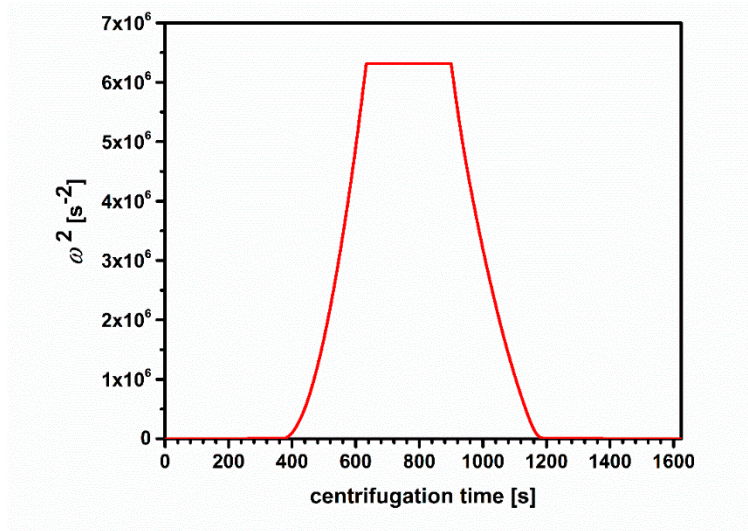

**Figure S2.** Estimation of the effective time of centrifugation along the lines given in [1]. Angular velocities-squared  $\omega^2$  are plotted against centrifugation time. Integration over time and division by maximum angular velocity-squared gives the equivalent time to centrifugation at maximum speed, which is regarded as the effective time of centrifugation.

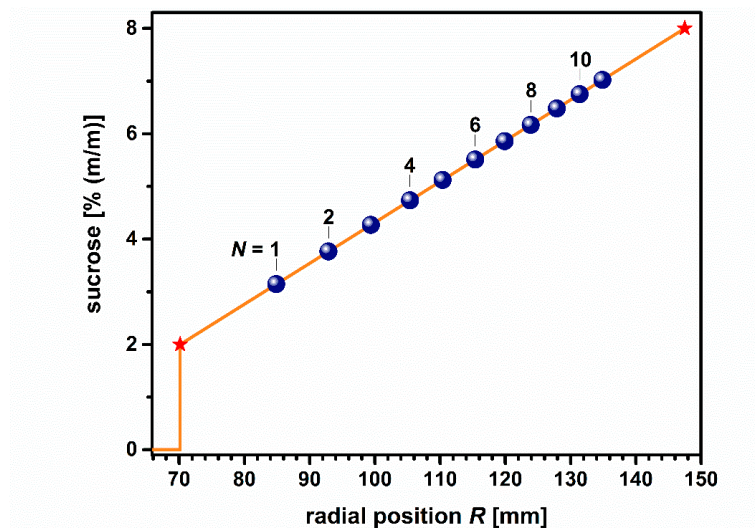

**Figure S3.** The graph shows the separation that is achieved in sorting colloidal clusters of up to eleven constituent particles via density gradient ultracentrifugation. The asterisks mark the onset (2% (m/m) sucrose) and the end (8% (m/m) sucrose) of the linear sucrose gradient. The cluster suspension was put on top of the gradient and centrifuged for 15 min at 24,000 rpm at 25 °C. The blue spheres indicate the radial positions of the individual bands within the gradient after centrifugation ( $N = 1$ :3.14% (m/m), 84.89 mm;  $N = 2$ :3.76% (m/m), 92.89 mm;  $N = 3$ :4.27% (m/m), 99.39 mm;  $N = 4$ :4.73% (m/m), 105.39 mm;  $N = 5$ :5.12% (m/m), 110.39 mm;  $N = 6$ :5.51% (m/m), 115.39 mm;  $N = 7$ :5.86% (m/m), 119.89;  $N = 8$ :6.17% (m/m), 123.89 mm;  $N = 9$ :6.48% (m/m), 127.89 mm;  $N = 10$ :6.75% (m/m), 131.39 mm;  $N = 11$ :7.02% (m/m), 134.89 mm).

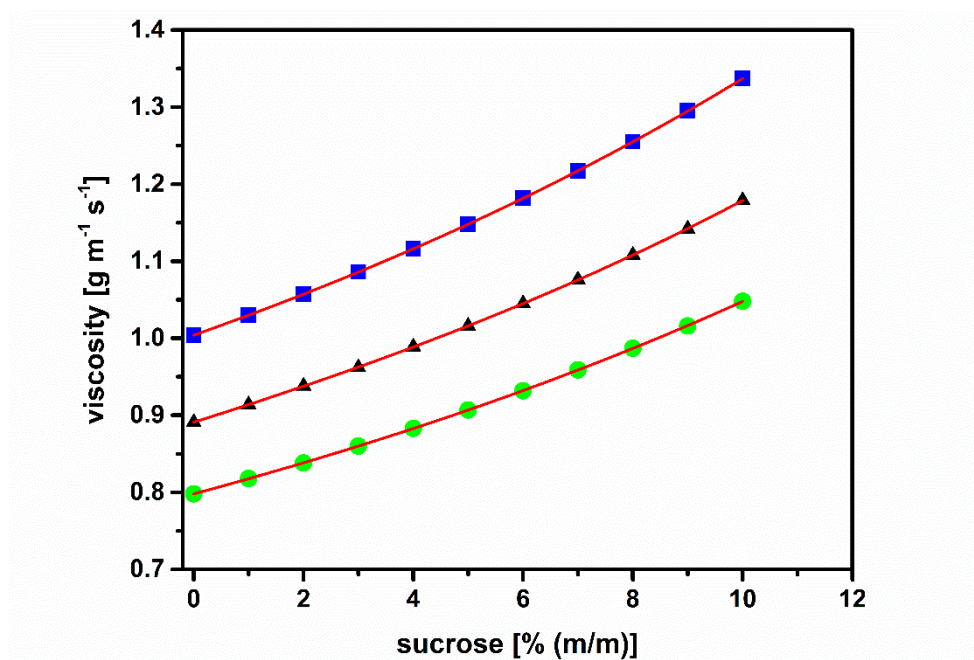

**Figure S4.** Viscosities of sucrose aqueous solutions at 20 °C (blue squares, fit curve:  $y = 1.00399 + 0.02533x + 5.89161 \times 10^{-4}x^2 + 2.07848 \times 10^{-5}x^3$ ), 25 °C (black triangles, fit curve:  $y = 0.89105 + 0.02247x + 3.85781 \times 10^{-4}x^2 + 2.44755 \times 10^{-5}x^3$ ) and 30 °C (green spheres, fit curve:  $y = 0.79803 + 0.01925x + 4.34149 \times 10^{-4}x^2 + 1.37918 \times 10^{-5}x^3$ ). The viscosities as the functions of the concentration and the temperature were taken from [2].

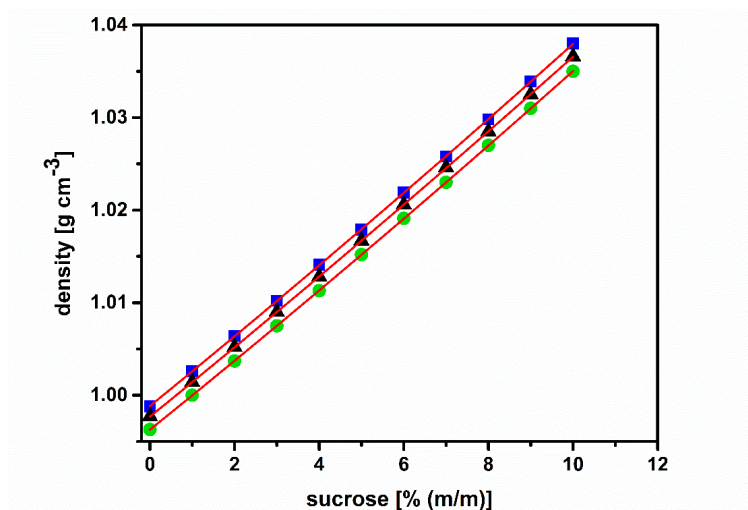

**Figure S5.** Densities of sucrose aqueous solution at 20 °C (blue squares, fit curve:  $y = 0.99884 + 0.00373x + 1.84149 \times 10^{-5}x^2$ ), 25 °C (black triangles, fit curve:  $y = 0.99769 + 0.00371x + 1.74825 \times 10^{-5}x^2$ ) and 30 °C (green spheres, fit curve:  $y = 0.99628 + 0.00369x + 1.88811 \times 10^{-5}x^2$ ). The densities as the functions of the concentration and the temperature were taken from [2].

## References

1. Schumaker, V.N. Zone Centrifugation. In *Advances in Biological and Medical Physics*, Lawrence, J.H., Gofman, J.W., Eds.; Academic Press: New York, NY, USA, 1967; Volume 11, pp. 245–339, doi:10.1016/B978-1-4832-3107-5.50011-X.
2. Price, C.A. Appendix C—Properties of Gradient Materials. In *Centrifugation in Density Gradients*, Price, C.A., Eds.; Academic Press: London, UK, 1982; pp. 327–389, doi:10.1016/B978-0-12-564580-5.50017-9.
